# Supplementary material for: Early evolution of the venom system in lizards and snakes
Source: Springer Nature journal article supplement (doi:10.1038/nature04328), 2005-11-16
Supplement: 41586_2006_BFnature04328_MOESM1_ESM.pdf [file 41586_2006_BFnature04328_MOESM1_ESM.pdf]

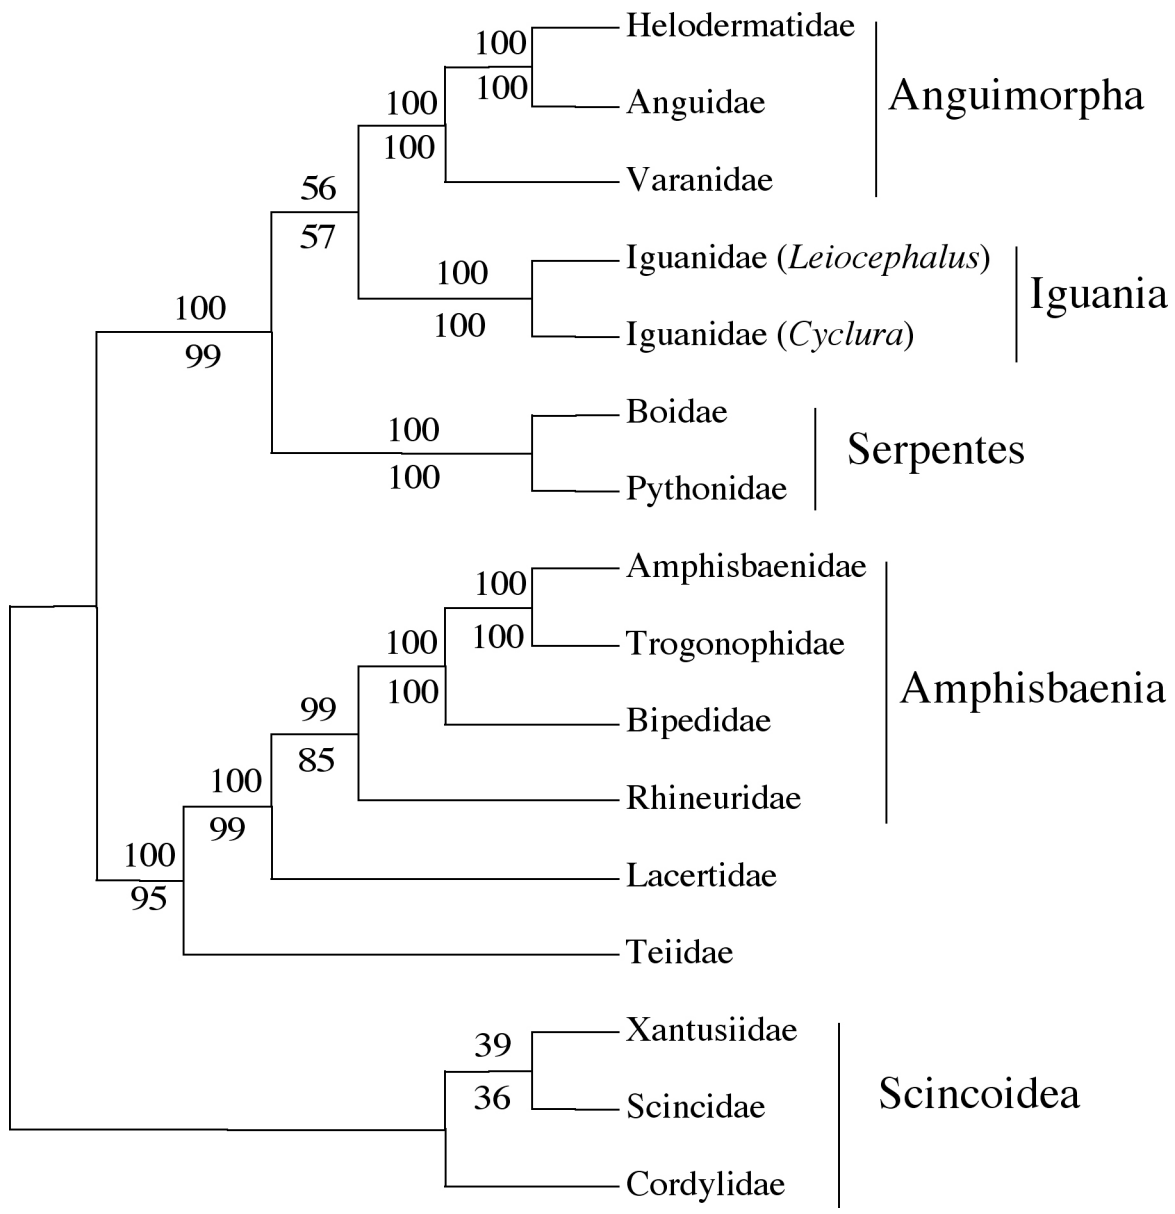

**Supplementary Figure 1:** Squamate molecular phylogeny. Values above branches: Bayesian posterior probabilities. Values below branches: Maximum Likelihood bootstrap values.

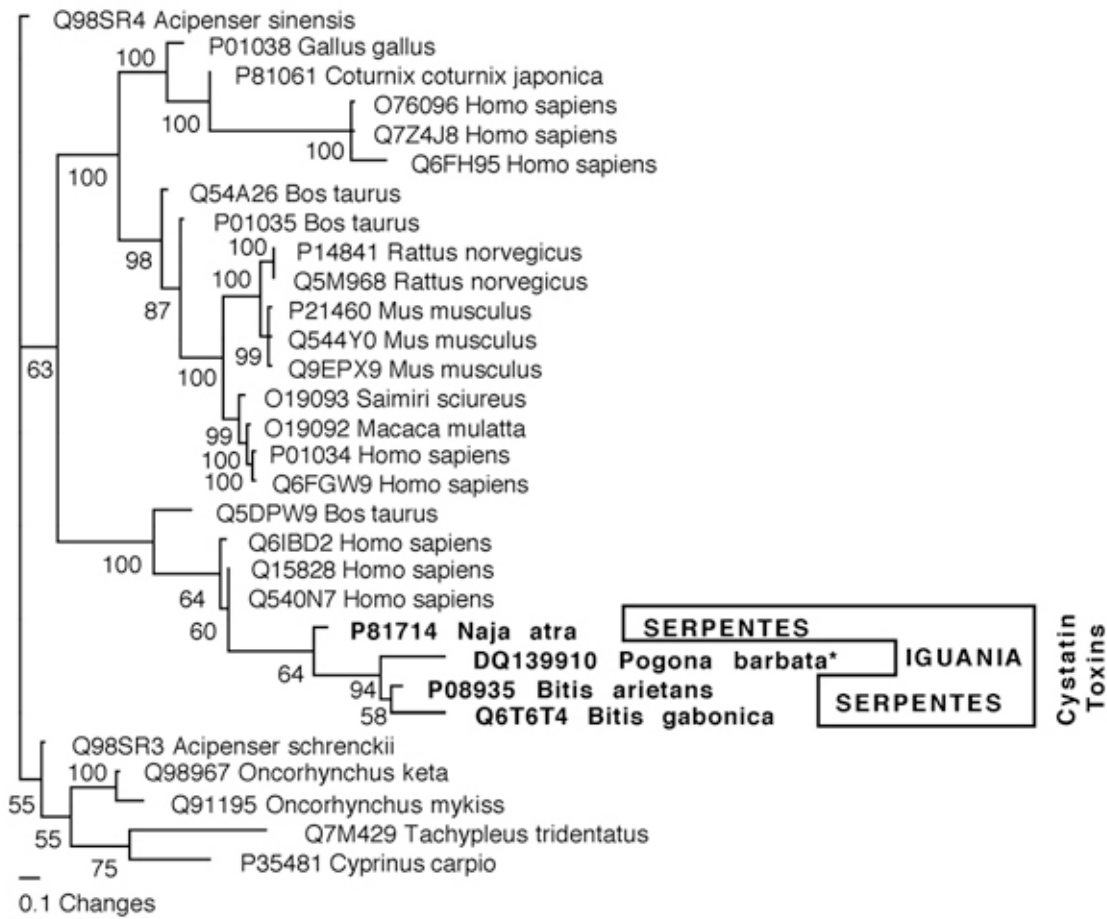

**Supplementary Figure 2:** Bayesian analysis of representative Cystatin-related sequences. In order to minimize confusion, all sequences are referred to by their SWISS-PROT accession numbers (<http://www.expasy.org/cgi-bin/prot-search-ful>). \* Designates transcripts obtained in this study.

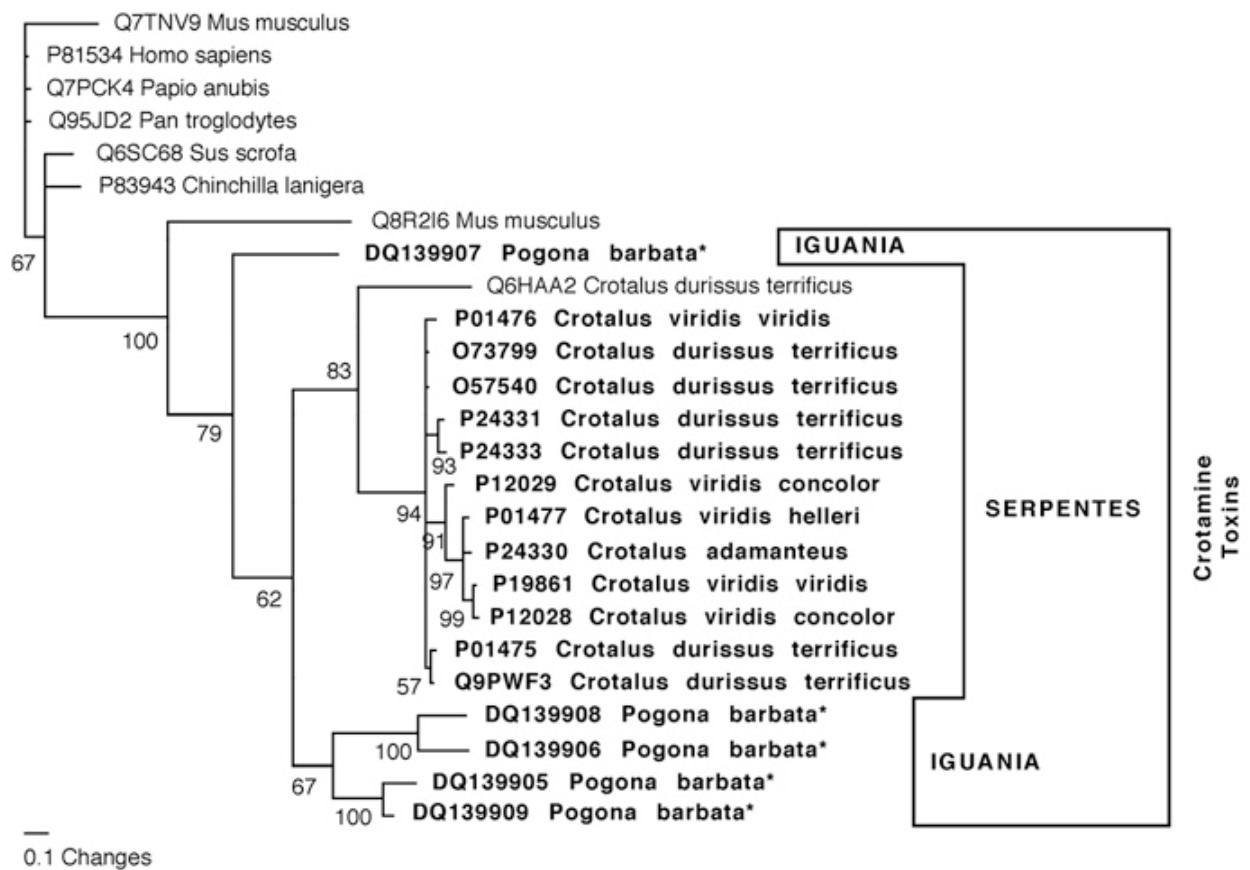

**Supplementary Figure 3:** Bayesian analysis of representative Crostamine-related sequences. In order to minimize confusion, all sequences are referred to by their SWISS-PROT accession numbers (<http://www.expasy.org/cgi-bin/sprot-search-ful>). \* Designates transcripts obtained in this study. UPP and LOW respectively refer to transcripts from the maxillary and mandibular glands of *Pogona barbata*.

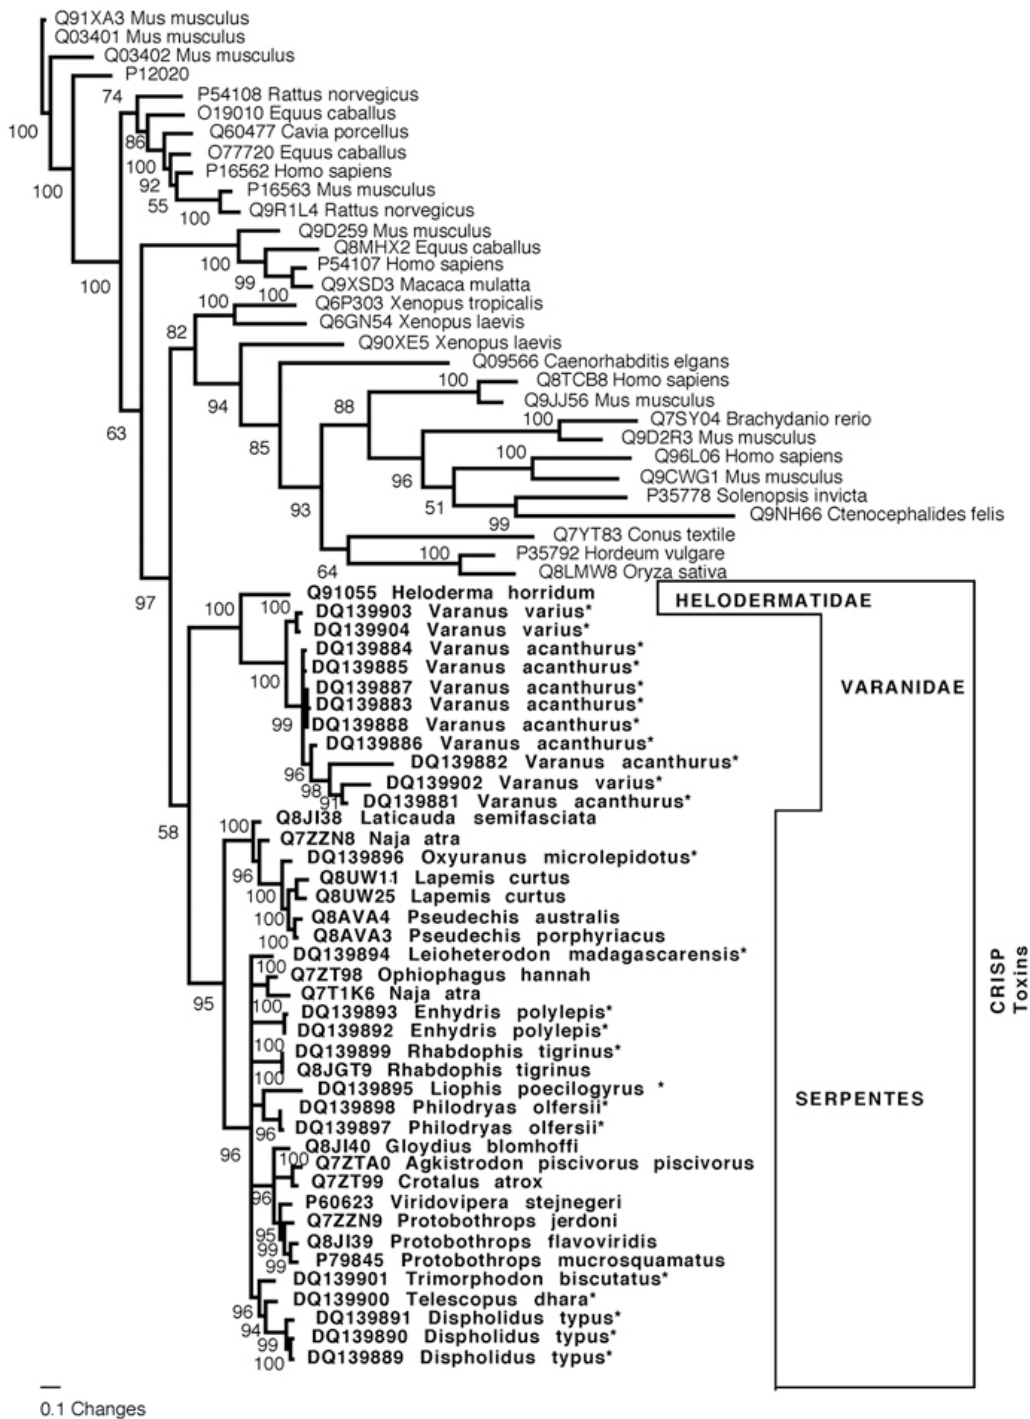

**Supplementary Figure 4:** Bayesian analysis of representative CRISP-related sequences. In order to minimize confusion, all sequences are referred to by their SWISS-PROT accession numbers (<http://www.expasy.org/cgi-bin/sprot-search-fun>). \* Designates transcripts obtained in this study.

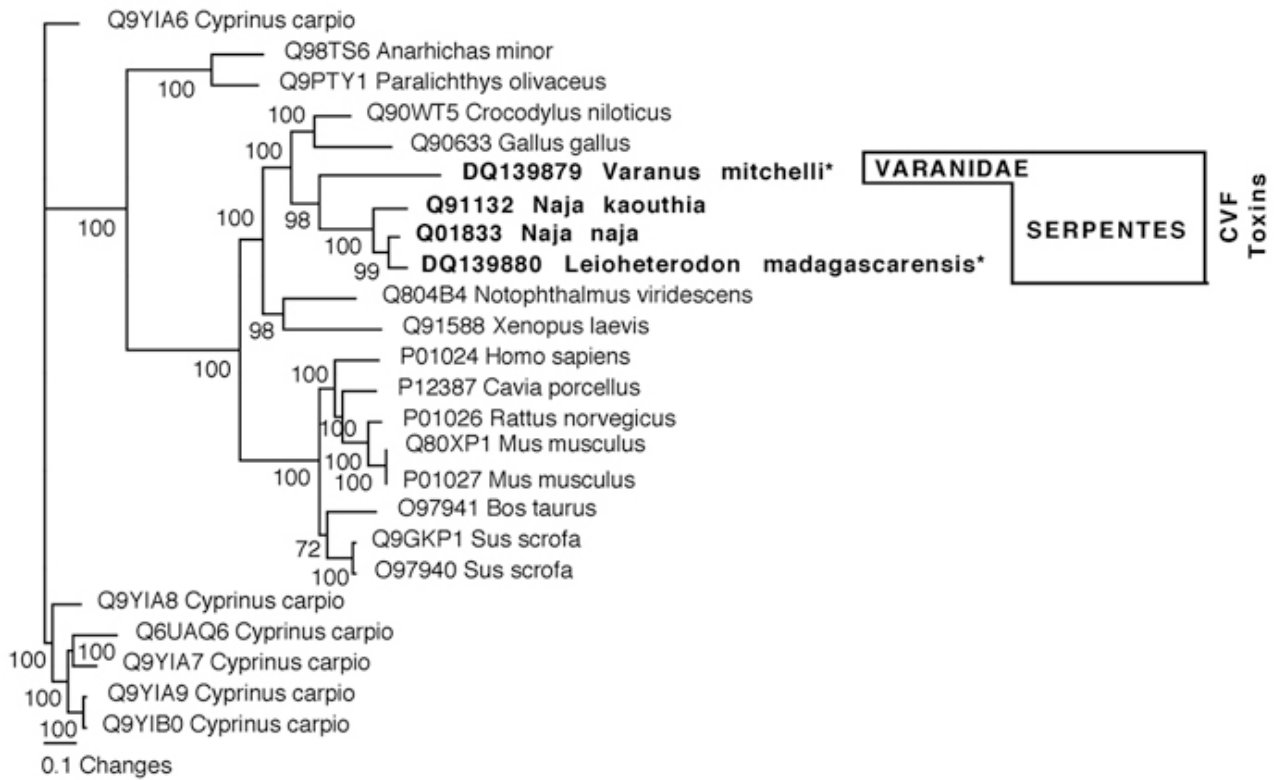

**Supplementary Figure 5:** Bayesian analysis of representative Cobra Venom Factor-related sequences. In order to minimize confusion, all sequences are referred to by their SWISS-PROT accession numbers (<http://www.expasy.org/cgi-bin/prot-search-ful>). \* Designates transcripts obtained in this study.

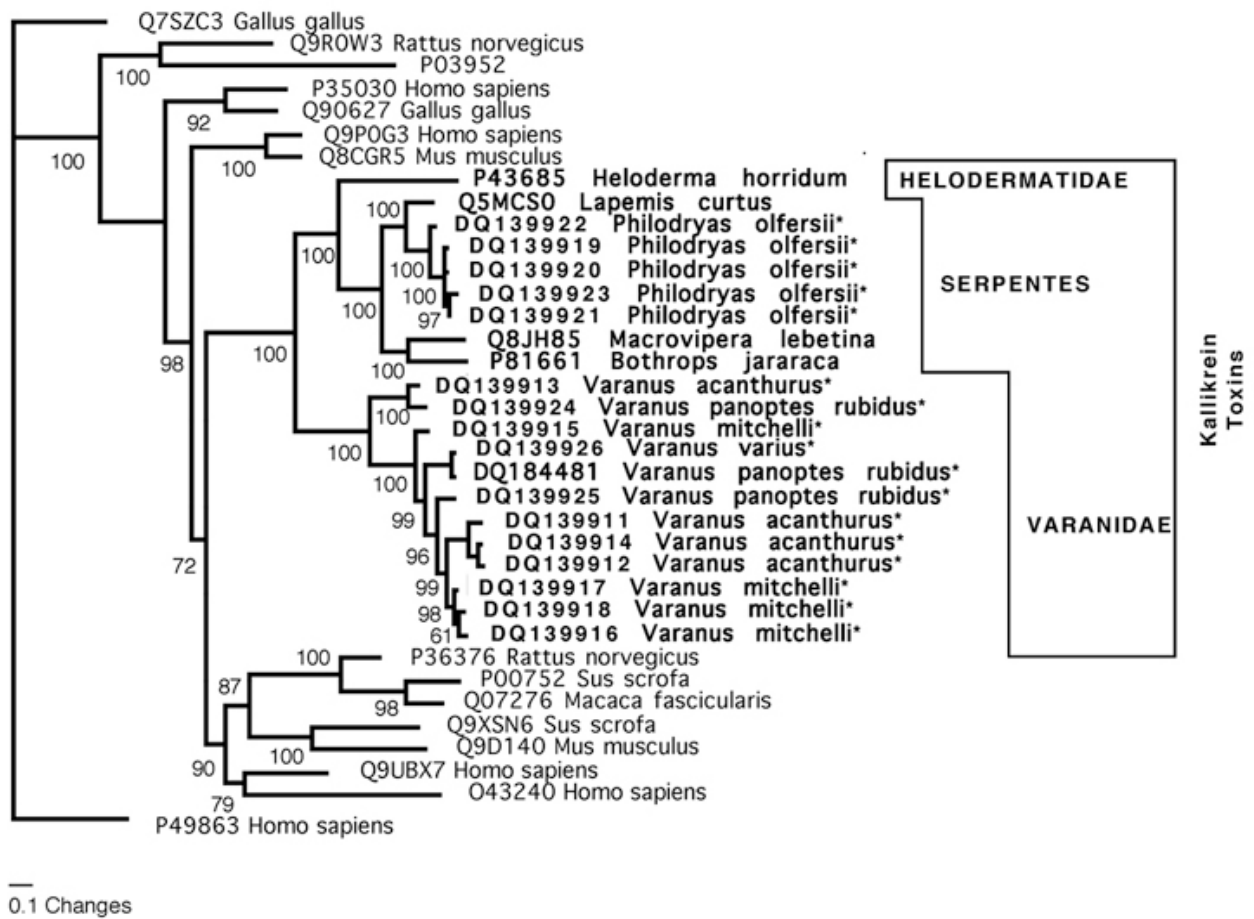

**Supplementary Figure 6:** Bayesian analysis of representative Kallikrein-related sequences. In order to minimize confusion, all sequences are referred to by their SWISS-PROT accession numbers (<http://www.expasy.org/cgi-bin/sprot-search-ful>). \* Designates transcripts obtained in this study.

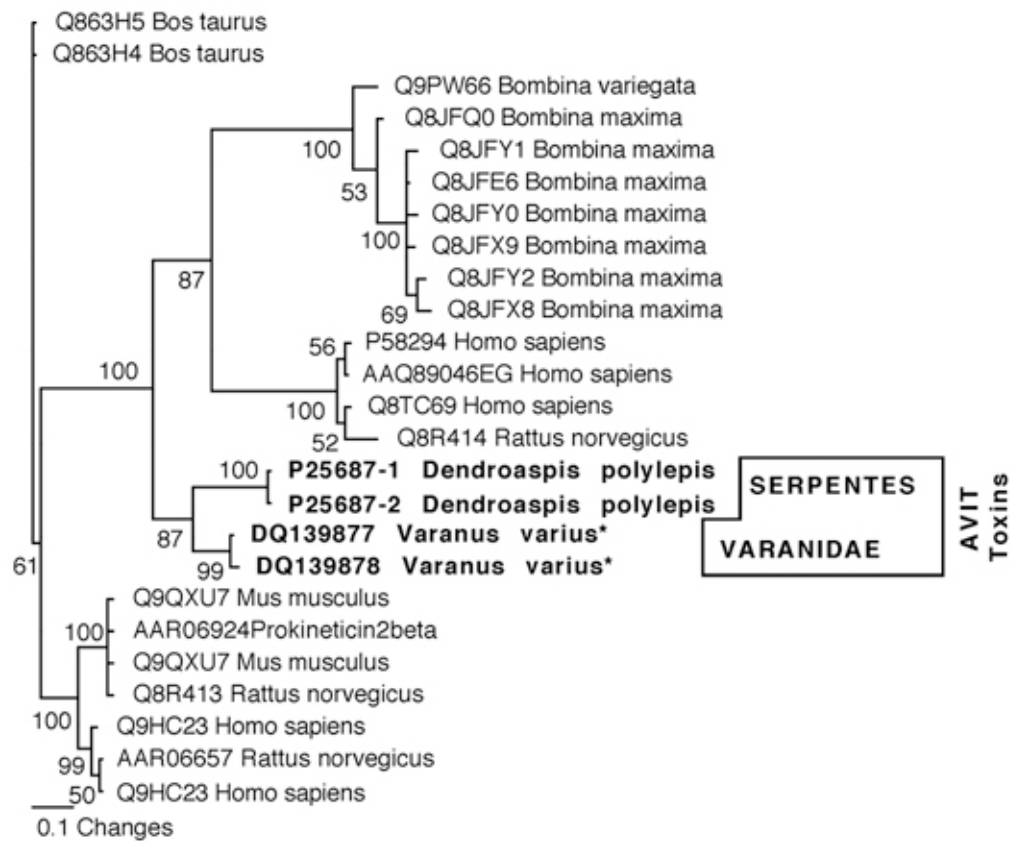

**Supplementary Figure 7:** Bayesian analysis of representative AVIT-related sequences. In order to minimize confusion, all sequences are referred to by their SWISS-PROT accession numbers (<http://www.expasy.org/cgi-bin/sprot-search-ful>). \* Designates transcripts obtained in this study.

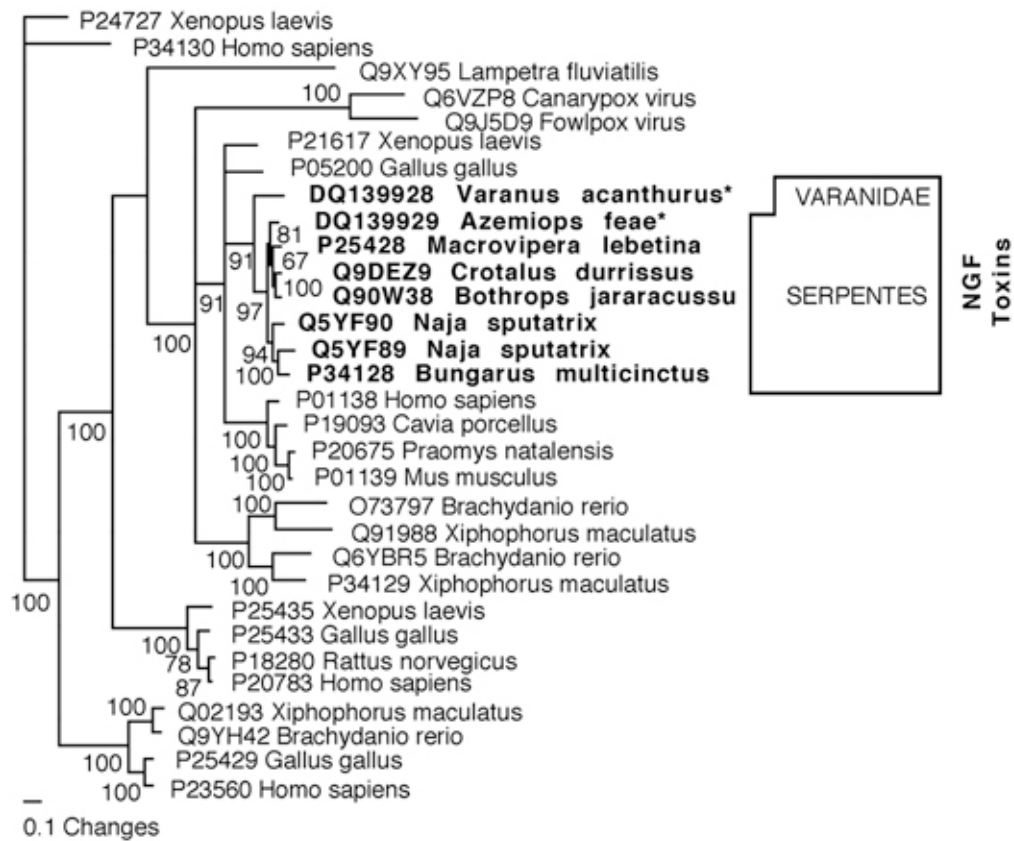

**Supplementary Figure 8:** Bayesian analysis of representative NGF-related sequences. In order to minimize confusion, all sequences are referred to by their SWISS-PROT accession numbers (<http://www.expasy.org/cgi-bin/sprot-search-ful>). \* Designates transcripts obtained in this study.



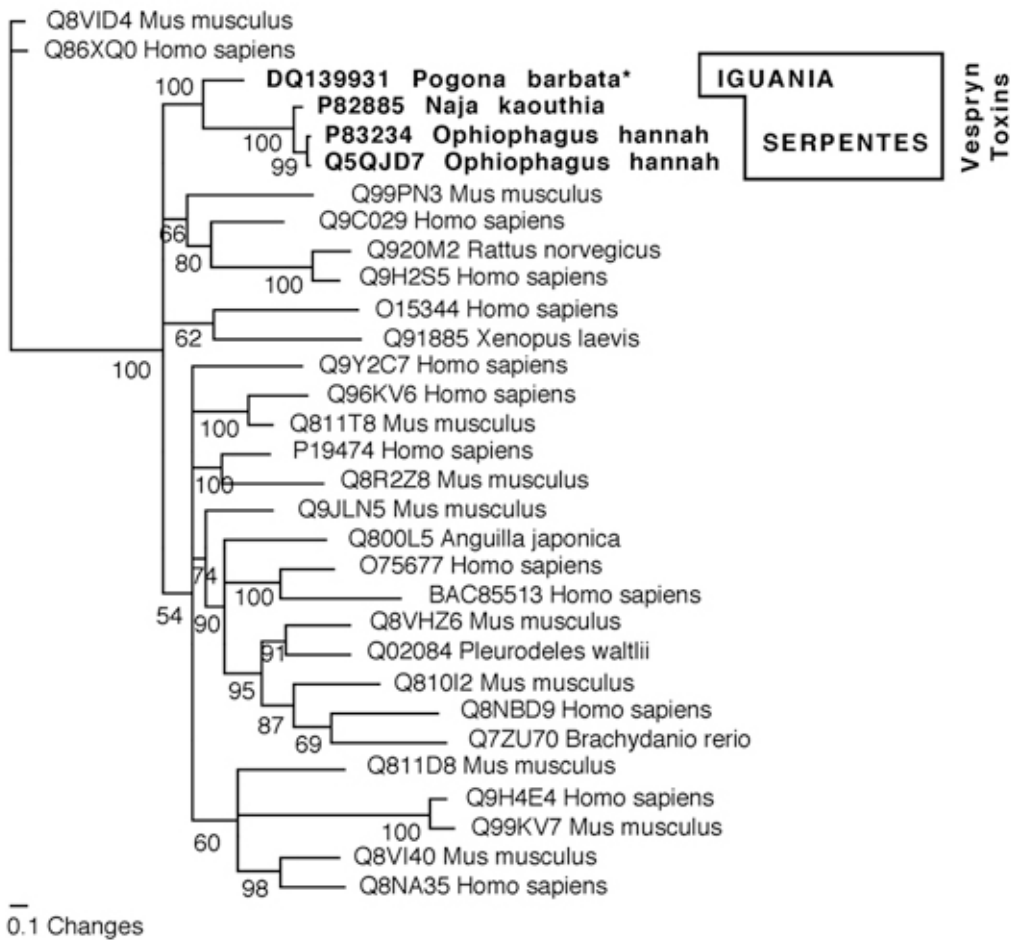

**Supplementary Figure 9:** Bayesian analysis of representative Vespryn-related sequences. In order to minimize confusion, all sequences are referred to by their SWISS-PROT accession numbers (<http://www.expasy.org/cgi-bin/sprot-search-ful>). \* Designates transcripts obtained in this study.

A)

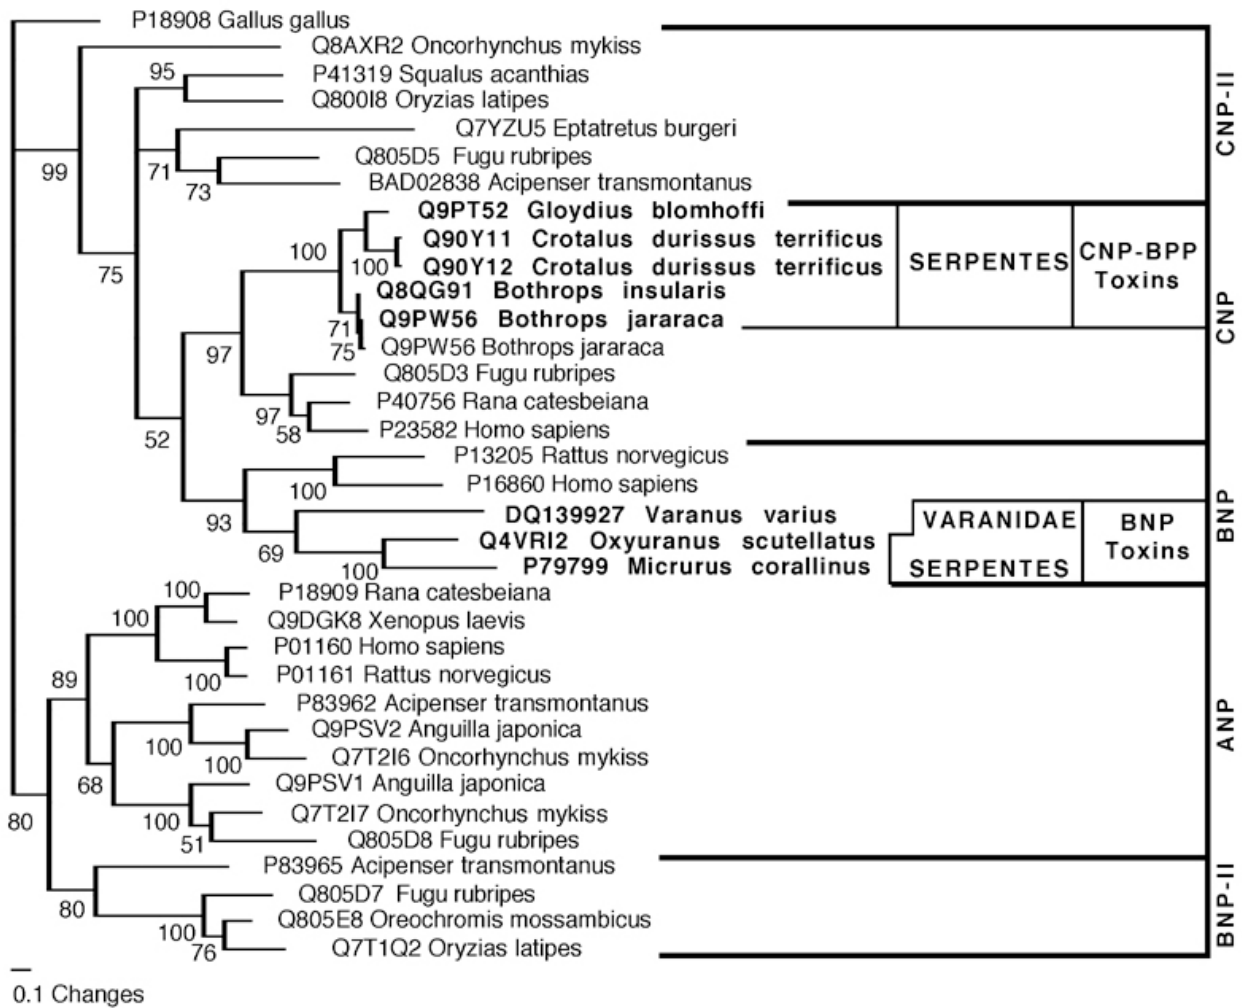

B)

|            |                                                                    |
|------------|--------------------------------------------------------------------|
| 1. GNP-1   | -----EKRLQPEGSC <b>+</b> FGQKMDRIGHVSGMGC <b>+</b> KNKFDPNKGSSTGKK |
| 2. TNP-c   | -----SDSKIGNC <b>+</b> CFGFPLDRIGSVSGLGC <b>+</b> NRIMQNPPKKFSGE-  |
| 3. DNP     | -----EVKYDPC <b>+</b> FGHKIDRINHVSNLGC <b>+</b> PSLRDPRPNAPSTSA    |
| 4. Lebetin | -GDNKPPKGGPP-NG <b>+</b> CFGHKIDRIGSHSGLGC <b>+</b> KNKVDNKG-----  |
| 5. BNP Rat | IQERLRNSKMAHSS <b>+</b> CFGQKIDRIGAVSRLGC <b>+</b> DGLRLF-----     |

**Supplementary Figure 10:** A) Bayesian analysis of representative full-length natriuretic toxins and related sequences. In order to minimize confusion, all sequences are referred to by their SWISS-PROT accession numbers (<http://www.expasy.org/cgi-bin/sprot-search-ful>). \* Designates transcripts obtained in this study. B) ) Sequence comparison of GNP-1 (DQ139927) from *V. varius* (Lace Monitor), 2) TNP-c (P83230) from *Oxyuranus microlepidotus* (Inland taipan), 3) DNP (P28374) from *Dendroaspis angusticeps* (Eastern Green Mamba), 4) Lebetin (Q7LZ09) from *Macrovipera lebetina* (Elephant snake) and 5) BNP from the rat (P13205) brain and atria. + designates conserved functional residues.

*Varanus varius*

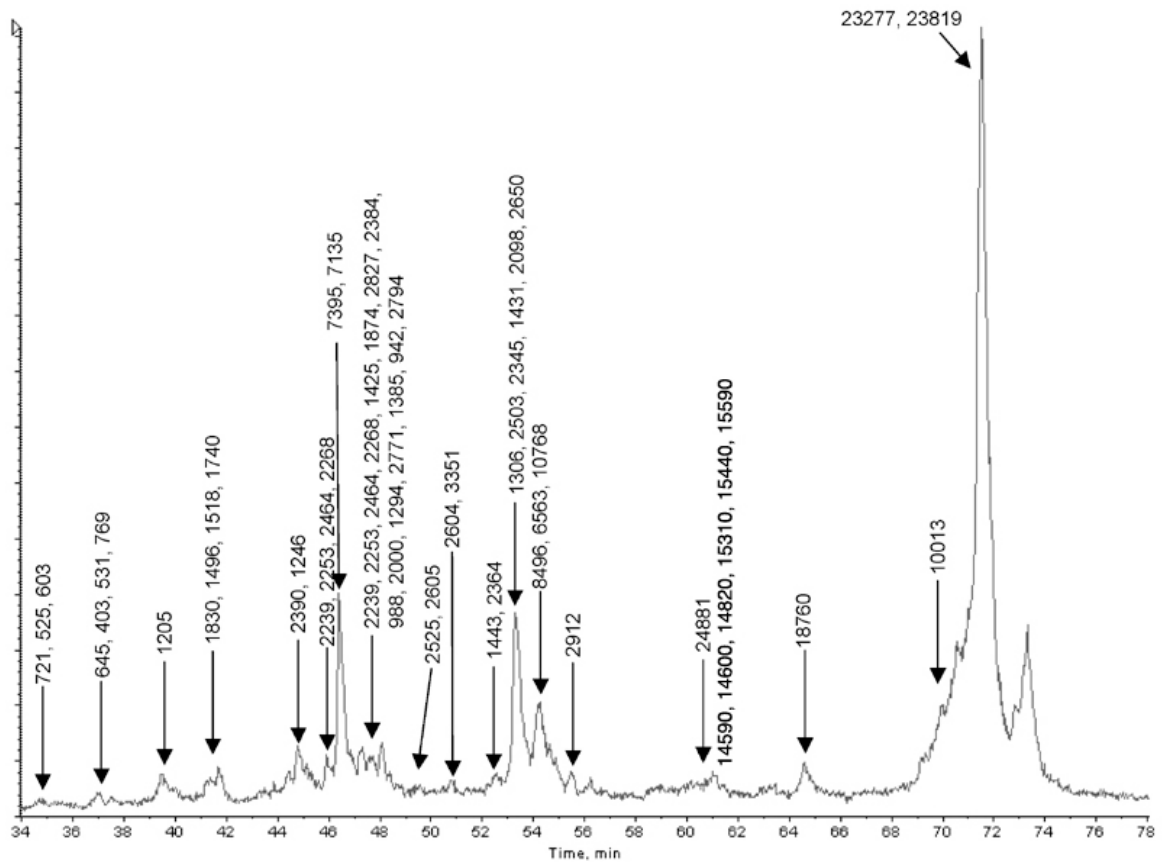

**Supplementary Figure 11:** Liquid Chromatography/Mass Spectrometry analysis of crude mandibular secretions from *Varanus varius* (Lace Monitor). Reconstructed masses in Daltons are shown above each peak.

**A)** **W G G** **HD**

1\* ^ GAFIMPGLTWGAGADSASDRSDLGAFQGGPDSCCQOHHDCSSVQITTAALQRKHGIFNLRPYTISHCQCDPTRFRRTCLMIDLNDFTIAD-SW  
2 ^ GAFIMPGLTWGAGNNAASDYSQDLGTEKEDFDWCCRDDHDCSDTMAALEYKHGMRNRYRPHTVSHCQCDNQFRSCLMNVKDRITADFSQ  
3 ^ GAFIMPGLTWGAGNNAASDYSQDLGTEKEDFDWCCRDDHDCSDTMAALEYKHGMRNRYRPHTVSHCQCDNQFRSCLMNVKDRITADFSQ

**B)** **H** **D**

1\* ITGGQECNEDSHHPWLVLLYAASFMCCGATLLINQDWVLPAAHCCYDSRPTHL YFGIHNTRKQPRGHEDQARDAVSTFCYPPDSPGTNNSCPSFRL-----DRGDDI-MLIKLNASVTYNHEIAPMAL  
2\* ITGGECNEDSHHPWLVIYTEANTMCCGATLLINQDWVLPAAHCCYKRGKIMLNFGVHNREOARGDEEYREA VGTFCYPPDSPGTNNSCPSFYTL-----DHGDDI-MLIKLNASVTYNHEIAPMAL  
3 ITGGQECDETHHPWLALLHRSEGSTWSGVLLNRDWILPAAHCEELGPMKICFGMKRNRYLRGDEQVKA AVKKCYPATAG-TIYNQNYVNTVIMNNDLLKRELFPMLIKLDSVDYNERVAPLSL  
4 VIGGHECDINEHPFLAFMYSPQYFCGMTLINQEWVLPAAHCD-KTYMRIYLGIHTPSVANDDEVIRYPKEKFTGPNKKKNVITD-----KDI-MLIRLNRPVKNSPHIAPISL  
5\* ^ IIGGECNONHEHSIVLLYNSGGFFCSGTLINHEWVLPAAHQN-RENTQIKLGVHNHPNEDDEQIRVPKEKYCGLGTMNCPQWN-----QDI-MLIRLNSSVNYSPHIAPISL  
6 IIGGHECNPSEHRSIVLYLYNSAGFFCSGTLINHEWVLPAAHQN-REDIQIRLGVHNHVHVYEDEQIRVPKEKLCGLSTNNCPQFS-----QDI-MLIRLNSSVNYSEHIAPISL  
7 IIGGHECNKPHSQPWQAAALFEKTRLLCGATLIPRWLLPAAHCLKPRYIV-HLGGHNLQKEEGCEQTRTATETSEFPHPGFNNSL-----P-----NKDHRNDI-MLYKMASPVSITWAVRPLITL

1\* PDRAAPLIGTECDIIGWGETELITIGS----VSHIPFCASINTMDNHFCDVSSVTITTD-DMIAGVLEGGPDAKGDSSGGPILLGGQLQGLVSRFGGYPGQPMMPGVYTKLIFS YREWLYSHIR-----  
2\* PDHAVPLIGTECDIIGWGETELIYVD---TASDVPILCASISTRENHFCEDAYSANMTPD-DMICAGDLKGGPDACR-DSSGPIILCGQLQGLVSRFGGIPCGQPKKPGVYTKLIFNYRKWIIRSS-----  
3 PITSPASLGAECSYIAGWGTTPDDVT---LPDVPVCVNIEIFNNAVCQVAR-DLWKEFTNKLCAGVDFGGKDSCK-DSSGPIILCGNQLTGNVSWGFN-CEGEEKYYGIKLIKFN-WIDNIIOGGTG  
4 PSNPPSVGSVCRIMGWGAITTSBDT---YPDVPHCANINLFNNTVCRKAYNGLPAR--TLCAGVYOGGIDTGC-DSSGPIILCGNQLFOGILSWGSDPCAEPKRPAPYTKVFDYLPWISIIAAGNKG  
5 PSNPPSVGSVCRIMGWGTITTSBEVT---YPKVPHCVNIQILHKEICBAAYPIILGNSNII CAGKILGDKDSCK-DSSGPIILCGNQLFOGIVSWGSDPCAQFLSLASTPSSLIIITGSRILW-----G  
6 PSNPPSMGSVCCVMGWGTITTSBEVT---YPEVPHCVDINILHIPVCAAYPTMSGK-NILCAGIIEGGKDSCK-DSSGPIILCGNQLFOGIVSWGSDPCAQFLPEGIYTKVFDYKDWIEGIIAAGNSG  
7 SSRQVTAAGTSLISGWGSTSS---POLRLPHTLRGANLTIIEHOKENAYPGNITD-TMVGCA SVQEGGKDSCK-DSSGPIILCGNQLFOGIVSWGSDPCAQFLTRKPGVYTKVCKYVDWITQETMKNN-G

1\* -----  
2\* -----  
3 --TQP-  
4 TATQPP  
5\* ^ -----  
6 NVLQBP-  
7 -----

**Supplementary Figure 12:** A) Alignment of Type III PLA<sub>2</sub>: 1. *Varanus varius* (Lace Monitor) DQ139930 and *Heloderma suspectum* (Gila Monster)

2. P80003 and 3. P16354. B) Alignment of representative kallikrein (minus signal peptides): toxin forms 1. *Varanus mitchelli* (Mitchell's Water Monitor) DQ139915, 2. *Varanus acanthurus* (Spiny-tailed Monitor) DQ139914, 3. *Heloderma horridum* (Beaded Lizard) P43685, 4. *Bothrops jararaca* (Jararaca) P81661, 5. *Philodryas olfersii* (Argentine Racer) DQ139923, 6. *Lapemis curtus* (Spine-bellied Sea Snake) Q5MCS0 and tissue kallikrein 7. *Homo sapiens* (Human) Q9UBX7. \* Designates transcripts obtained in this study. ^ Designates partial sequence.

1\* MIVFILL-SLAAVLQÖFVA-D--VNFSESEPRRTEKÖTEIVDMHNSFRRSVNPTARNMLKMEWYPEAADNAEERWA<sup>KR</sup>YÖCI-YDHSANSERVIGGIÖ<sup>E</sup>CGENIYKSSNPRAWTEIIQSWYDEIQNFEY  
2 MIAFILL-CFAAVLQÖSFG-N--VDFNSESEPRRKKÖKETEVDLHNSLRRRVSPPTASNMLKMEWYPEAASNAEERWANTCS-LNHSPPDNLRVLEGIÖ<sup>F</sup>CGESIYMSSNARWTTEIIHLWDEYKNFVY  
3\* MEFVILL-SLAAVLQÖSFG-N--VDFNSESEPR IKAKÖREIVDKHNAFRRSV RPTASNMLRMEWYSEASNAEERVA RCI-LDHSPKTSR ILNGIK<sup>E</sup>CGENIYMSSI PMWIDI IKLWDEYKNFVY  
4\* MIVFILL-SLAAVLEQÖSFG-N--VDFNSESEPRRPEKÖKETEVDRHNSFRRSVRPTASNMLKMEWYSEASNAEERVA RCN-LGHS PDSSR ILDGIK<sup>E</sup>CGENIYMSSNPRAWTEIIQSWYDEYKNFVY  
5 MIAFVILLSLAAVLQÖSSG-T--VDFASESSNKKYÖKETEVDKHNLRRSVKPTARNMLÖMKWNSRAAÖN<sup>KR</sup>AKR WANRC-T-FASHPNKRITVGLR<sup>E</sup>CGENIFMSSÖPFPMSSG VVQAWYDEYKFFVY  
6\* MIAFVILLSLAAVLQÖSSG-T--VDFASESSNKKDYRKEIVDKHNDLRRSV KPTARNMLÖMKWNSRAAÖN<sup>KR</sup>AKR WANRC-T-FASHPYTRITVGLR<sup>E</sup>CGENIFMSSÖPFPMSSG VVQAWYDEYKFFVY  
7\* MILLKLYLTLAATLQÖSRGWTSLDDLDMTNPETIQNETINKHNDLRRTVDP PAKNMLKMSWDNTIAESAK<sup>KR</sup>RALRCN<sup>E</sup>YKHEHTSIAERTIGV<sup>E</sup>CGENHFMSNPRTWSSSIQSWFDERNSFMF  
8 MILLSLYLCLAAMLHÖSEGEASPK-LPGLMTPNPDQÖTETITDKHNLRRIVEPTASNMLKMTWSNKIAÖNAÖRSANQCT-LEHTSKEERTIDGVE<sup>E</sup>CGENLFPSSAPYTWMSYAIQNWFERKYYFRF

**Supplementary Figure 13: Sequence comparison of CRISP toxins: 1) DQ139892 *Enhydryis polylepsis* (Macleay's water snake), 2) Q7TIK6 *Naja***

*atra* (Taiwanese cobra), 3) DQ139890 *Dispholidus typus* (Boomslang), 4) DQ139901 *Trimorphodon biscutatus* (Lyre snake), 5) Q8AV A4 *Pseudochis australis* (Mulga snake) , 6) DQ139896 *Oxyuramus microlepidotus* (Inland taipan), 7) DQ139904 *Varanus varius* (Lace monitor) and 8) Q91055

*Heloderma horridum* (Beaded lizard).
